# Supplementary material
Source: publisher figshare collection journal article supplement (https://acs.figshare.com/ndownloader/files/3946960)
Supplement: Supplementary file 1 [file 3946960]

## **Supplement to “Empirical multi-dimensional space for scoring peptide spectrum matches in shotgun proteomics”**

Mark V. Ivanov<sup>1,2</sup>, Lev I. Levitsky<sup>1,2</sup>, Anna A. Lobas<sup>1,2</sup>, Tanja Panic<sup>3</sup>, Ünige A. Laskay<sup>4</sup>, Goran Mitulovic<sup>3</sup>, Rainer Schmid<sup>3</sup>, Marina L. Pridatchenko<sup>1</sup>, Yury O. Tsybin<sup>4</sup>, and Mikhail V. Gorshkov<sup>1,2\*</sup>

<sup>1</sup>Institute for Energy Problems of Chemical Physics, Russian Academy of Sciences, Moscow 119334, Russia

<sup>2</sup>Moscow Institute of Physics and Technology (State University), Dolgoprudny 141700, Moscow region, Russia

<sup>3</sup>Medical University of Vienna, Vienna 1090, Austria

<sup>4</sup>Biomolecular Mass Spectrometry Laboratory, Ecole Polytechnique Fédérale de Lausanne, Lausanne 1015, Switzerland

\*Correspondence should be addressed to Dr. Mikhail V. Gorshkov, Institute for Energy Problems of Chemical Physics, Russian Academy of Sciences, Moscow 119334, Russia.

E-mail: [gorshkov@chph.ras.ru](mailto:gorshkov@chph.ras.ru), [mike.gorshkov@gmail.com](mailto:mike.gorshkov@gmail.com)

Tel/FAX: +7(499)137-8257

**Supplementary Table S1. Number of “false” identifications (Self-Boosted Percolator) by protein length.** Note that, contrary to the below results, peptides from proteins longer than 2000 residues constitute only ~10% of all peptides in the database. As stated in the manuscript, the additional PSMs reported by Self-Boosted Percolator tend to come from the longest proteins in the database.

| Replicate | Number of “false” identifications from large proteins (>= 2000 a.a. residues) | Other “false” identifications |
|-----------|-------------------------------------------------------------------------------|-------------------------------|
| UPS2_1    | 46                                                                            | 1                             |
| UPS2_2    | 49                                                                            | 5                             |
| UPS2_3    | 4                                                                             | 3                             |

All 9 PSMs from the right column of Table 1 (i.e. “false” PSMs not from long proteins) come from a single protein for all three replicates. This protein (sp|P02042|HBD\_HUMAN, Hemoglobin subunit delta) is similar to one of the proteins in UPS (sp|P68871|HBB\_HUMAN, Hemoglobin subunit beta).

“False” PSMs reported by MP score and PeptideProphet are distributed as expected for false PSMs, i.e. proteins with length of >2000 residues account for ~10% of these PSMs (4 of 42 for MP score, 5 of 44 for PeptideProphet).

**Supplementary Table S2. Protein identifications reported by Self-Boosted Percolator (3 replicates combined).** About 90% of PSMs come from titin, the longest protein in the database. Note: the average number of theoretical tryptic peptides for a protein in the database used is around 80.

| PSMs | Theoretical Peptides | Protein               | Description                                                 |
|------|----------------------|-----------------------|-------------------------------------------------------------|
| 90   | 7070                 | sp Q8WZ42 TITIN_HUMAN | Titin                                                       |
| 3    | 1969                 | sp Q8NF91 SYNE1_HUMAN | Nesprin-1                                                   |
| 1    | 1531                 | sp Q8WXH0 SYNE2_HUMAN | Nesprin-2                                                   |
| 1    | 347                  | sp Q9Y566 SHAN1_HUMAN | SH3 and multiple ankyrin repeat domains protein 1           |
| 1    | 1079                 | sp Q8IZT6 ASPM_HUMAN  | Abnormal spindle-like microcephaly-associated protein       |
| 1    | 1406                 | sp Q5VST9 OBSCN_HUMAN | Obscurin                                                    |
| 1    | 492                  | sp P50851 LRBA_HUMAN  | Lipopolysaccharide-responsive and beige-like anchor protein |
| 1    | 1653                 | sp Q8WXI7 MUC16_HUMAN | Mucin-16                                                    |

In the figures below we plot the distributions of several descriptors for titin matches for three replicates. As shown in the figures, titin PSMs do not follow the distributions of correct PSMs, but rather those of decoy matches. This observation strongly suggests that the titin PSMs recovered by Self-Boosted Percolator are mostly false and do not indicate superior sensitivity of Self-Boosted Percolator.

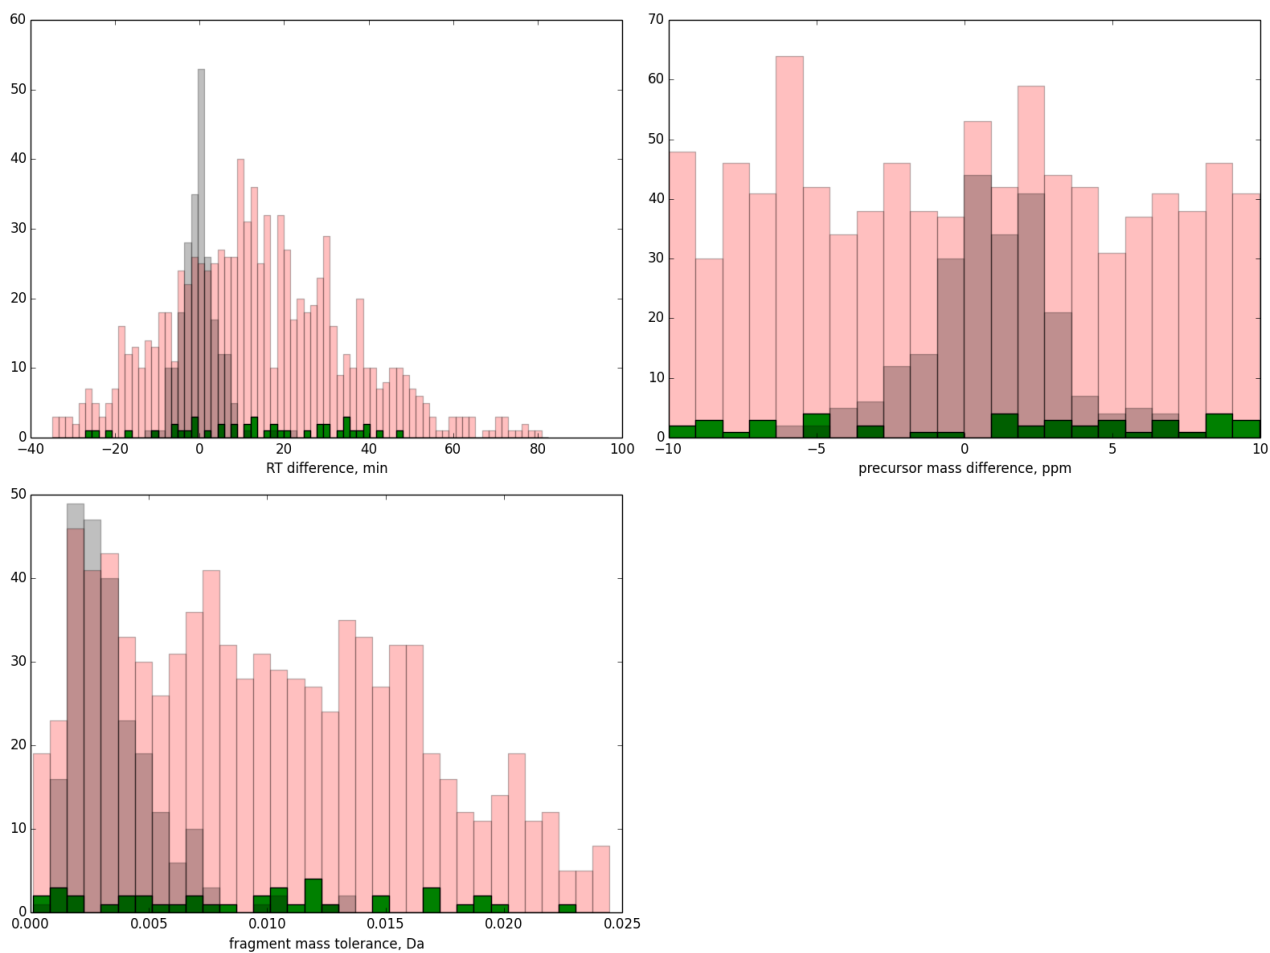

**Supplementary Figure S1. Distribution of descriptors for UPS2\_1 replicate.** Bright green: titin PSMs. Bleak red: decoy PSMs. Bleak dark: top 1% FDR PSMs.

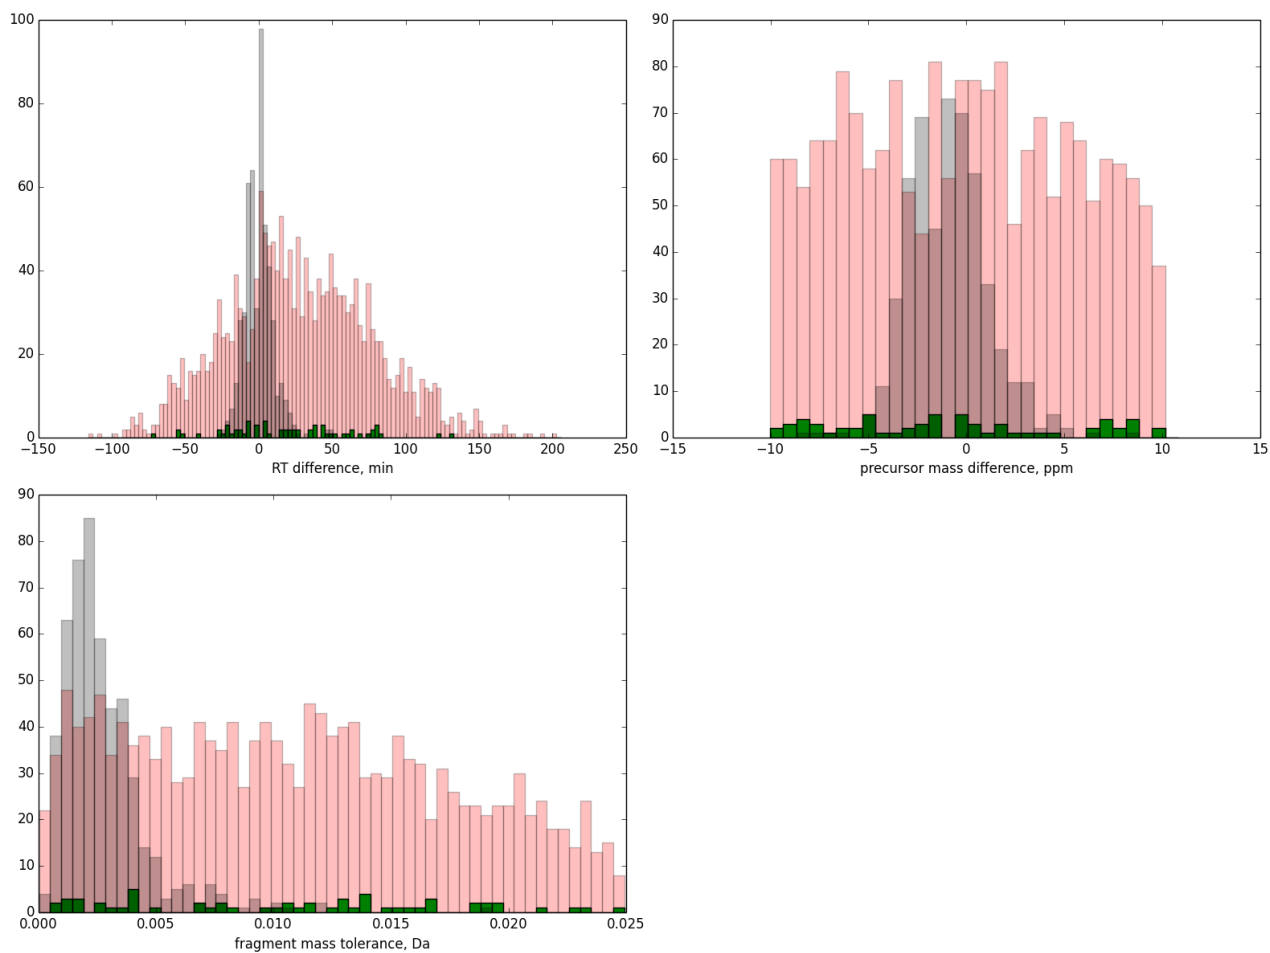

**Supplementary Figure S2. Distribution of descriptors for UPS2\_2 replicate.** Bright green: titin PSMs. Bleak red: decoy PSMs. Bleak dark: top 1% FDR PSMs.

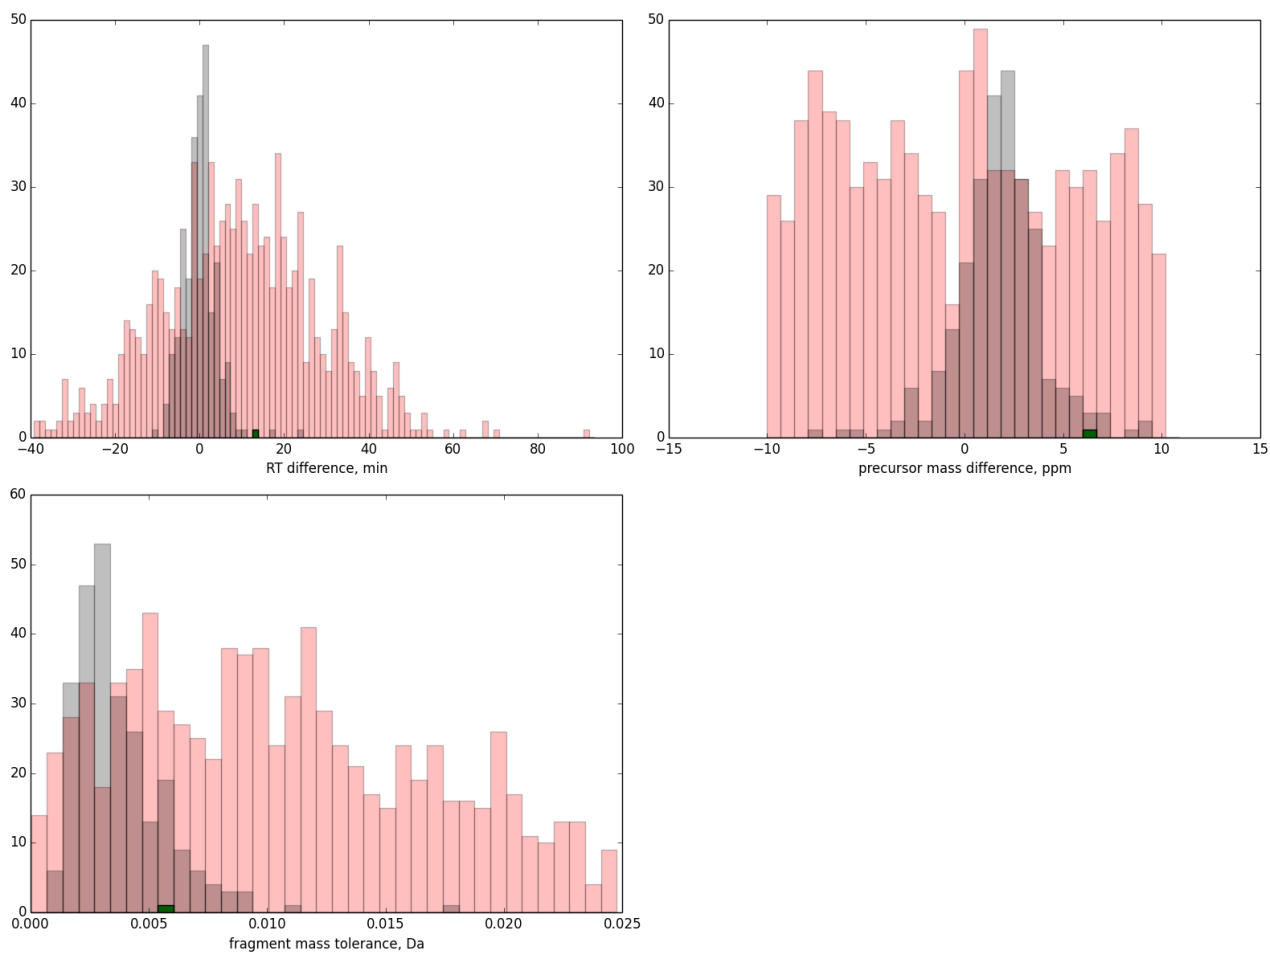

**Supplementary Figure S3. Distribution of descriptors for UPS2\_3 replicate (very few titin matches).** Bright green: titin PSMs. Bleak red: decoy PSMs. Bleak dark: top 1% FDR PSMs.
